# Supplementary material
Source: PubMed Central journal article supplement (PMC3608703)
Supplement: NIHMS437701-supplement-1.pdf [file NIHMS437701-supplement-1.pdf]

Supplemental Table I. Expression of cytokines, chemokines, and other marker genes characteristic of the indicated cell types in the lungs of unsensitized mice and mice sensitized with HDM for 3 or 5 weeks <sup>a</sup>.

| Cell type     | Gene symbol    | No HDM                                          |       | HDM                          |       |        |       |                                                                                    |       |        |       |                                                         |      |       |      |                       |       |
|---------------|----------------|-------------------------------------------------|-------|------------------------------|-------|--------|-------|------------------------------------------------------------------------------------|-------|--------|-------|---------------------------------------------------------|------|-------|------|-----------------------|-------|
|               |                | <i>Pglyrp1</i> <sup>-/-</sup> / WT <sup>b</sup> |       | WT HDM / WT PBS <sup>c</sup> |       |        |       | <i>Pglyrp1</i> <sup>-/-</sup> HDM / <i>Pglyrp1</i> <sup>-/-</sup> PBS <sup>c</sup> |       |        |       | <i>Pglyrp1</i> <sup>-/-</sup> HDM / WT HDM <sup>d</sup> |      |       |      | <i>p</i> <sup>e</sup> |       |
|               |                | 0 wks                                           | SEM   | 3 wks                        | SEM   | 5 wks  | SEM   | 3 wks                                                                              | SEM   | 5 wks  | SEM   | 3 wks                                                   | SEM  | 5 wks | SEM  | 3 wks                 | 5 wks |
| Th1           | <i>Il2</i>     | -1.51                                           | 0.10  | -2.35                        | 0.09  | 2.16   | 0.20  | 1.05                                                                               | 0.06  | 1.63   | 0.06  | 2.46                                                    | 0.13 | -1.26 | 0.15 | 0.000                 | 0.069 |
|               | <i>Ifng</i>    | -1.18                                           | 0.10  | -1.37                        | 0.08  | 2.82   | 0.08  | 1.37                                                                               | 0.15  | 2.02   | 0.15  | 1.87                                                    | 0.20 | -1.40 | 0.06 | 0.000                 | 0.005 |
|               | <i>Cxcl9</i>   | -1.07                                           | 0.03  | 3.34                         | 0.12  | 3.19   | 0.33  | 9.65                                                                               | 1.15  | 5.25   | 1.15  | 2.89                                                    | 0.34 | 1.65  | 0.17 | 0.002                 | 0.016 |
|               | <i>Cxcl10</i>  | -1.06                                           | 0.02  | 2.39                         | 0.10  | 2.35   | 0.10  | 4.32                                                                               | 0.14  | 2.69   | 0.14  | 1.81                                                    | 0.06 | 1.14  | 0.08 | 0.000                 | 0.090 |
| Th2           | <i>Il4</i>     | -1.30                                           | 0.04  | 4.48                         | 0.15  | 5.41   | 0.33  | 3.14                                                                               | 0.24  | 2.50   | 0.24  | -1.43                                                   | 0.11 | -2.16 | 0.13 | 0.003                 | 0.001 |
|               | <i>Il13</i>    | 1.32                                            | 0.08  | 12.63                        | 0.70  | 14.60  | 1.16  | 2.49                                                                               | 0.19  | 7.59   | 0.19  | -5.07                                                   | 0.38 | -1.92 | 0.04 | 0.000                 | 0.001 |
|               | <i>Il33</i>    | -1.10                                           | 0.05  | 1.85                         | 0.13  | 3.23   | 0.22  | 1.22                                                                               | 0.12  | 1.69   | 0.12  | -1.52                                                   | 0.16 | -1.91 | 0.12 | 0.016                 | 0.003 |
|               | <i>Tnfrsf4</i> | -1.10                                           | 0.05  | 1.47                         | 0.10  | 1.94   | 0.20  | 1.20                                                                               | 0.13  | 1.39   | 0.13  | -1.23                                                   | 0.14 | -1.39 | 0.18 | 0.197                 | 0.037 |
| Th17          | <i>Cxcl1</i>   | -1.18                                           | 0.05  | 9.80                         | 0.51  | 12.11  | 1.29  | 6.36                                                                               | 0.43  | 6.25   | 0.43  | -1.54                                                   | 0.11 | -1.94 | 0.03 | 0.004                 | 0.003 |
|               | <i>Cxcl2</i>   | -1.24                                           | 0.03  | 5.99                         | 0.58  | 7.08   | 0.46  | 6.19                                                                               | 0.16  | 4.40   | 0.16  | 1.03                                                    | 0.69 | -1.61 | 0.08 | 0.356                 | 0.002 |
|               | <i>Cxcl5</i>   | -1.20                                           | 0.06  | 86.15                        | 6.85  | 109.51 | 4.50  | 27.58                                                                              | 2.94  | 47.72  | 2.94  | -3.12                                                   | 0.37 | -2.29 | 0.17 | 0.000                 | 0.000 |
|               | <i>Il17a</i>   | 1.02                                            | 0.06  | 24.84                        | 1.77  | 30.56  | 1.36  | 13.49                                                                              | 1.48  | 17.92  | 1.48  | -1.84                                                   | 0.21 | -1.71 | 0.11 | 0.004                 | 0.001 |
|               | <i>Il21</i>    | 1.04                                            | 0.07  | 24.20                        | 1.80  | 26.75  | 0.81  | 8.62                                                                               | 0.77  | 10.39  | 0.77  | -2.81                                                   | 0.26 | -2.57 | 0.29 | 0.000                 | 0.000 |
|               | <i>Il22</i>    | -1.50                                           | 0.09  | -1.81                        | 0.07  | 2.82   | 0.27  | -1.96                                                                              | 0.12  | 2.32   | 0.12  | -1.08                                                   | 0.94 | -1.21 | 0.06 | 0.341                 | 0.064 |
|               | <i>Il23a</i>   | -1.20                                           | 0.10  | 2.44                         | 0.12  | 6.38   | 0.10  | 2.33                                                                               | 0.08  | 3.09   | 0.08  | -1.05                                                   | 0.70 | -2.07 | 0.13 | 0.394                 | 0.000 |
|               | <i>Tgfb1</i>   | 1.09                                            | 0.02  | -1.29                        | 0.06  | 1.19   | 0.07  | -1.40                                                                              | 0.06  | -1.01  | 0.06  | -1.09                                                   | 0.75 | -1.19 | 0.09 | 0.199                 | 0.066 |
|               | <i>Rorgt</i>   | -1.35                                           | 0.07  | 2.82                         | 0.10  | 5.83   | 0.09  | 3.72                                                                               | 0.17  | 2.57   | 0.17  | 1.32                                                    | 0.06 | -2.27 | 0.11 | 0.003                 | 0.000 |
|               | Treg           | <i>Ccl1</i>                                     | -1.05 | 0.03                         | 2.72  | 0.14   | 5.72  | 0.13                                                                               | 4.57  | 0.16   | 8.36  | 0.16                                                    | 1.68 | 0.06  | 1.46 | 0.10                  | 0.000 |
| <i>Ccl17</i>  |                | -1.48                                           | 0.05  | 4.99                         | 0.44  | 5.78   | 0.39  | 9.09                                                                               | 0.78  | 16.99  | 0.78  | 1.82                                                    | 0.16 | 2.94  | 0.19 | 0.005                 | 0.001 |
| <i>Ccl27a</i> |                | -1.29                                           | 0.06  | -1.47                        | 0.07  | -2.10  | 0.05  | 1.41                                                                               | 0.12  | -1.05  | 0.12  | 2.08                                                    | 0.17 | 2.00  | 0.17 | 0.000                 | 0.000 |
| <i>Foxp3</i>  |                | -1.25                                           | 0.05  | 1.00                         | 0.02  | 1.38   | 0.02  | 1.89                                                                               | 0.13  | 2.45   | 0.13  | 1.88                                                    | 0.12 | 1.78  | 0.07 | 0.001                 | 0.001 |
| <i>Il10</i>   |                | -1.19                                           | 0.05  | 2.19                         | 0.05  | 3.40   | 0.16  | 3.67                                                                               | 0.23  | 5.67   | 0.23  | 1.68                                                    | 0.10 | 1.67  | 0.15 | 0.002                 | 0.006 |
| Macrophages   | <i>Arg1</i>    | -1.07                                           | 0.03  | 11.72                        | 0.48  | 13.27  | 0.98  | 4.10                                                                               | 0.10  | 4.69   | 0.10  | -2.86                                                   | 0.07 | -2.83 | 0.19 | 0.000                 | 0.001 |
|               | <i>Chi3l1</i>  | -1.19                                           | 0.06  | 2.83                         | 0.14  | 3.20   | 0.33  | 2.83                                                                               | 0.12  | 2.56   | 0.12  | -1.00                                                   | 0.70 | -1.25 | 0.06 | 0.458                 | 0.065 |
|               | <i>Chi3l3</i>  | -1.18                                           | 0.09  | 2.50                         | 0.10  | 31.48  | 2.51  | 4.22                                                                               | 0.20  | 17.54  | 0.20  | 1.69                                                    | 0.08 | -1.80 | 0.18 | 0.000                 | 0.004 |
|               | <i>Fizz1</i>   | -1.89                                           | 0.04  | 51.51                        | 2.00  | 78.17  | 5.90  | 28.03                                                                              | 2.28  | 73.71  | 2.28  | -1.84                                                   | 0.15 | -1.06 | 0.04 | 0.001                 | 0.179 |
|               | <i>Mrc1</i>    | -1.40                                           | 0.08  | 1.22                         | 0.21  | 1.71   | 0.21  | 1.12                                                                               | 0.11  | 1.24   | 0.11  | -1.09                                                   | 0.77 | -1.38 | 0.05 | 0.091                 | 0.014 |
|               | <i>Nos2</i>    | -2.13                                           | 0.10  | -1.26                        | 0.06  | -1.66  | 0.03  | -1.63                                                                              | 0.04  | -1.63  | 0.04  | -1.29                                                   | 0.08 | 1.02  | 0.73 | 0.097                 | 0.468 |
| cDC           | <i>Cd273</i>   | -1.86                                           | 0.04  | 4.35                         | 0.16  | 11.90  | 1.17  | 3.11                                                                               | 0.25  | 7.95   | 0.25  | -1.40                                                   | 0.11 | -1.50 | 0.14 | 0.004                 | 0.013 |
|               | <i>Cd274</i>   | -1.13                                           | 0.06  | 1.21                         | 0.03  | 1.56   | 0.06  | 1.27                                                                               | 0.08  | 1.50   | 0.08  | 1.05                                                    | 0.73 | -1.04 | 0.78 | 0.474                 | 0.430 |
|               | <i>Tnfrsf4</i> | -1.25                                           | 0.07  | 3.03                         | 0.23  | 5.56   | 0.70  | 1.53                                                                               | 0.11  | 2.46   | 0.11  | -1.98                                                   | 0.16 | -2.26 | 0.15 | 0.005                 | 0.006 |
| pDC           | <i>Aldh1a1</i> | 1.53                                            | 0.07  | 1.75                         | 0.09  | 1.14   | 0.02  | 1.91                                                                               | 0.15  | 2.07   | 0.15  | 1.09                                                    | 0.74 | 1.81  | 0.18 | 0.166                 | 0.004 |
|               | <i>Aldh1a2</i> | -1.21                                           | 0.01  | -1.08                        | 0.03  | -1.98  | 0.03  | 1.84                                                                               | 0.14  | 2.01   | 0.14  | 1.98                                                    | 0.15 | 3.98  | 0.27 | 0.000                 | 0.000 |
|               | <i>Ido1</i>    | 1.08                                            | 0.05  | 1.26                         | 0.05  | -1.66  | 0.15  | 2.36                                                                               | 0.12  | 2.21   | 0.12  | 1.88                                                    | 0.09 | 3.66  | 0.24 | 0.000                 | 0.000 |
| Eosinophils   | <i>Ccl7</i>    | -1.42                                           | 0.07  | 3.48                         | 0.11  | 3.65   | 0.04  | 1.78                                                                               | 0.11  | 2.67   | 0.11  | -1.95                                                   | 0.12 | -1.36 | 0.03 | 0.000                 | 0.002 |
|               | <i>Ccl11</i>   | -1.06                                           | 0.05  | 7.39                         | 0.18  | 8.03   | 0.52  | 4.62                                                                               | 0.13  | 5.34   | 0.13  | -1.60                                                   | 0.05 | -1.50 | 0.07 | 0.000                 | 0.004 |
|               | <i>Ccl24</i>   | -1.19                                           | 0.05  | 1.63                         | 0.18  | 2.51   | 0.15  | 1.25                                                                               | 0.13  | 1.56   | 0.13  | -1.30                                                   | 0.14 | -1.61 | 0.07 | 0.080                 | 0.003 |
| Goblet cells  | <i>Cilca3</i>  | -1.19                                           | 0.06  | 866.92                       | 37.89 | 857.87 | 40.09 | 465.87                                                                             | 35.53 | 679.90 | 35.53 | -1.86                                                   | 0.15 | -1.26 | 0.85 | 0.001                 | 0.060 |
|               | <i>Muc5ac</i>  | -1.04                                           | 0.01  | 52.01                        | 4.78  | 71.83  | 9.53  | 35.43                                                                              | 2.82  | 45.17  | 2.82  | -1.47                                                   | 0.12 | -1.59 | 0.09 | 0.018                 | 0.027 |
| PMN + other   | <i>Pglyrp1</i> | <-100                                           | 0.00  | 11.85                        | 1.13  | 9.82   | 0.73  | 0.00                                                                               | 0.00  | 0.00   | 0.00  | <-100                                                   | 0.00 | <-100 | 0.00 | 0.000                 | 0.000 |

<sup>a</sup> The results are means of 3 experiments with RNA from 4–5 mice/group in each experiment measured by qRT-PCR and presented as heat-maps in Fig. 6.

The qRT-PCR data have been deposited in NCBI GEO at <http://www.ncbi.nlm.nih.gov/geo/>, accession number GSE43137.

<sup>b</sup> Ratios of the amount of mRNA in unsensitized *Pglyrp1*<sup>-/-</sup> to WT mice; ratios of <1 were converted to negative fold difference using the formula: (-1)/ratio.

<sup>c</sup> Ratios of the amount of mRNA in HDM-sensitized to unsensitized mice; ratios of <1 were converted to negative fold difference using the formula: (-1)/ratio.

<sup>d</sup> Ratios of fold induction by HDM in *Pglyrp1*<sup>-/-</sup> mice to fold induction by HDM in WT mice (*Pglyrp1*<sup>-/-</sup> HDM/PBS / WT HDM/PBS); ratios of <1 were converted to negative fold difference using the formula: (-1)/ratio; significantly higher ratios are in red and significantly lower ratios are in blue ( $p < 0.05$ , *t*-test).

<sup>e</sup> The significance of differences in gene activation between *Pglyrp1*<sup>-/-</sup> and WT mice determined by the two-sample one-tailed *t*-test.
